# Supplementary material for: Highly selective fluorescent probe for detecting mercury ions in water
Source: Royal Society of Chemistry journal article supplement (doi:10.1039/d3ra02791k), 2023-01-01
Supplement: d3ra02791k1.pdf [file d3ra02791k1.pdf]

## Supporting Information

### Highly selective fluorescent probe for detecting mercury ion in water

Yanfeng Shi<sup>a</sup>, Bingxu Li<sup>a</sup>, Zhifeng Wang<sup>a</sup>, Yanhao Zhang<sup>a</sup>, Zhibin Zhang<sup>a</sup>, Xu Zhang<sup>b\*</sup>, Fulin Li<sup>c\*</sup>

<sup>a</sup> *School of Municipal and Environmental Engineering, Shandong Jianzhu University, Jinan, China*

<sup>b</sup> *School of Architecture and Urban Planning, Shandong Jianzhu University, Jinan, China*

<sup>c</sup> *Water Resources Research Institute of Shandong Province, Jinan, China*

*Corresponding author. \* X. Zhang: Tel +86 156 6830 3582; E-mail:*

*15668303582@163.com*

*\* F. L. Li: E-mail: fulinli@126.com.*

## Table of Contents

1. HRMS of probe **TPH** and reaction products of probe **TPH** and  $\text{Hg}^{2+}$
2.  $^1\text{H}$ NMR and  $^{13}\text{C}$ NMR data of probe **TPH**
3. Effects of pH on the recognition of probe **TPH** for  $\text{Hg}^{2+}$
4. The emission of the probe **TPH** at different excitation wavelengths
5. The stability of the probe **TPH** in water
6. The forms of salts were used of the metal ions

# 1. HRMS of probe TPH and reaction products of probe TPH and Hg<sup>2+</sup>

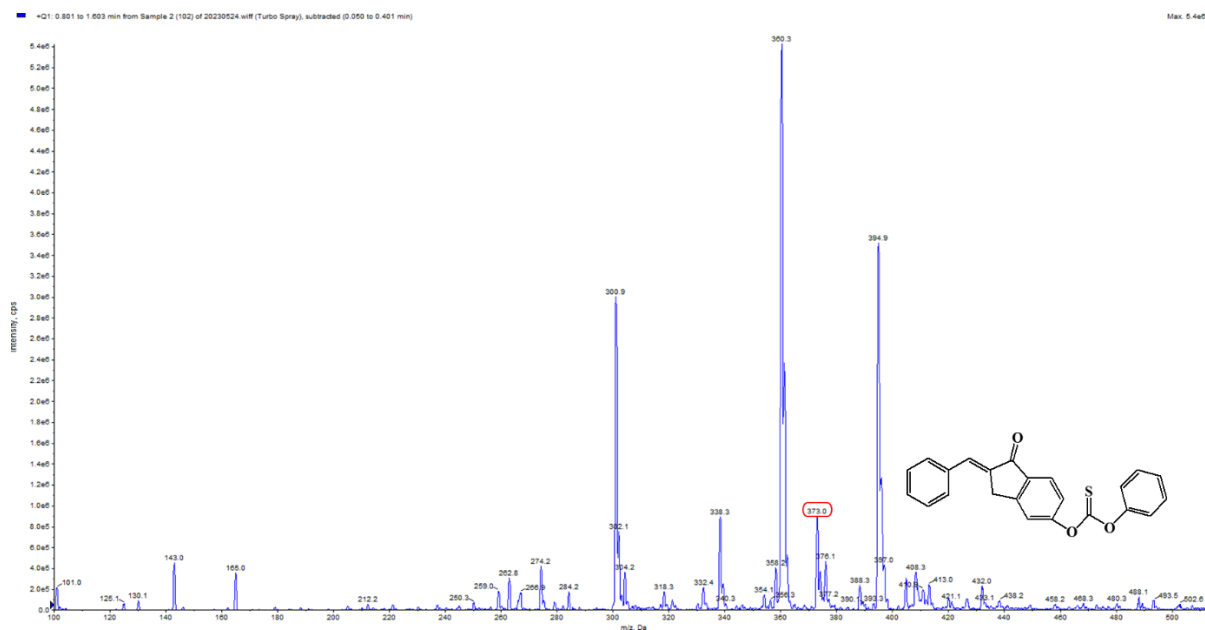

Figure S1. The HRMS data of probe TPH

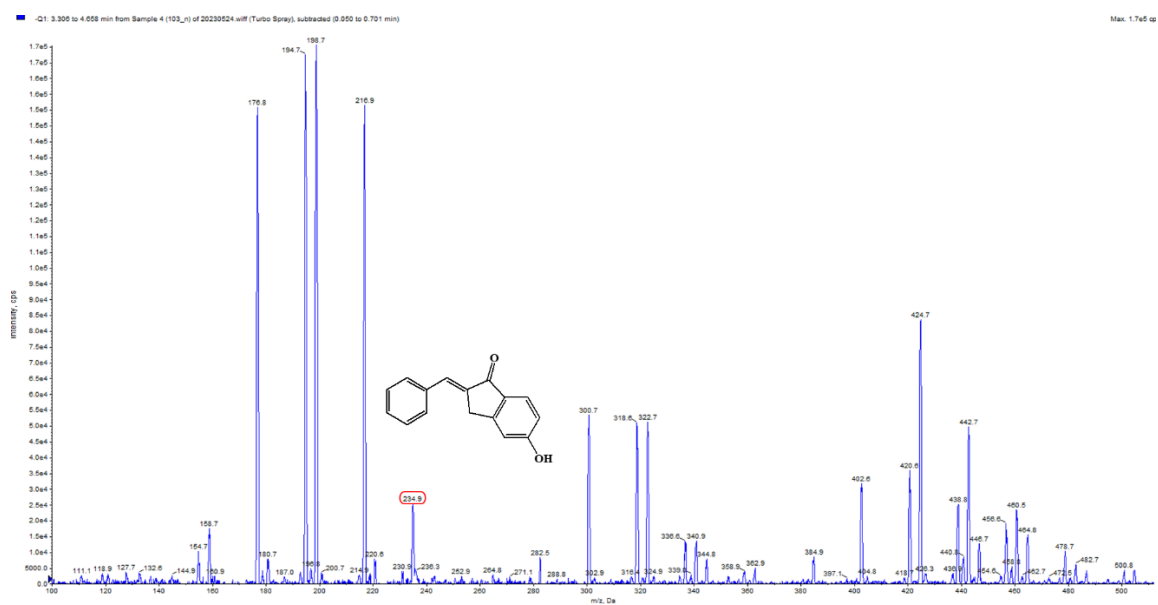

Figure S2. The HRMS data of the reaction products of probe TPH and Hg<sup>2+</sup>.

## 2. $^1\text{H}$ NMR and $^{13}\text{C}$ NMR data of probe TPH

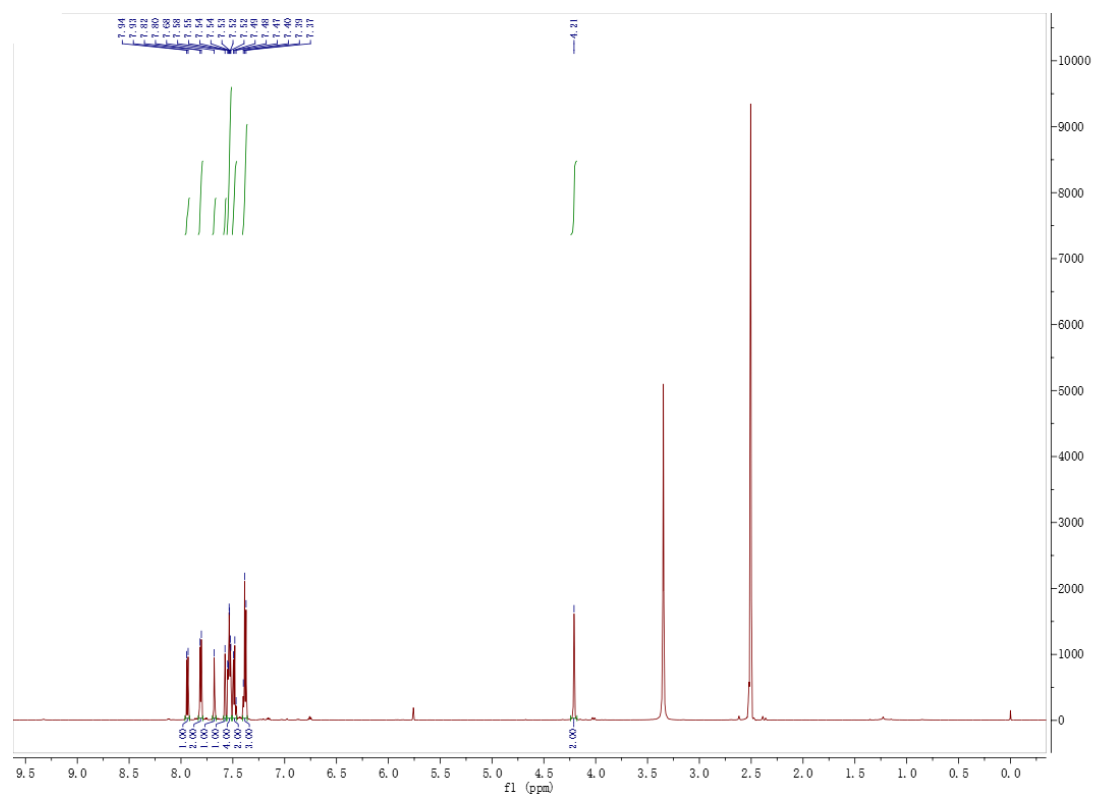

Figure S3.  $^1\text{H}$ -NMR data of probe TPH.

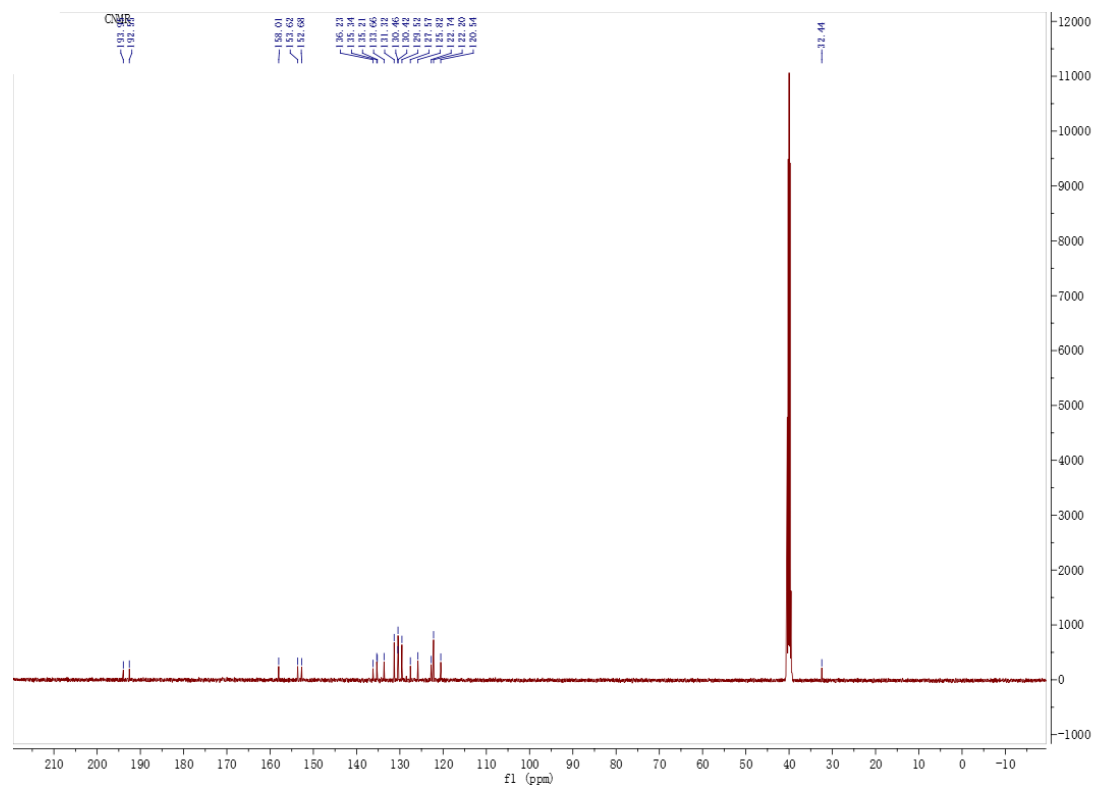

Figure S4.  $^{13}\text{C}$ -NMR data of probe TPH.

### 3. Effects of pH on the recognition of probe TPH for $\text{Hg}^{2+}$

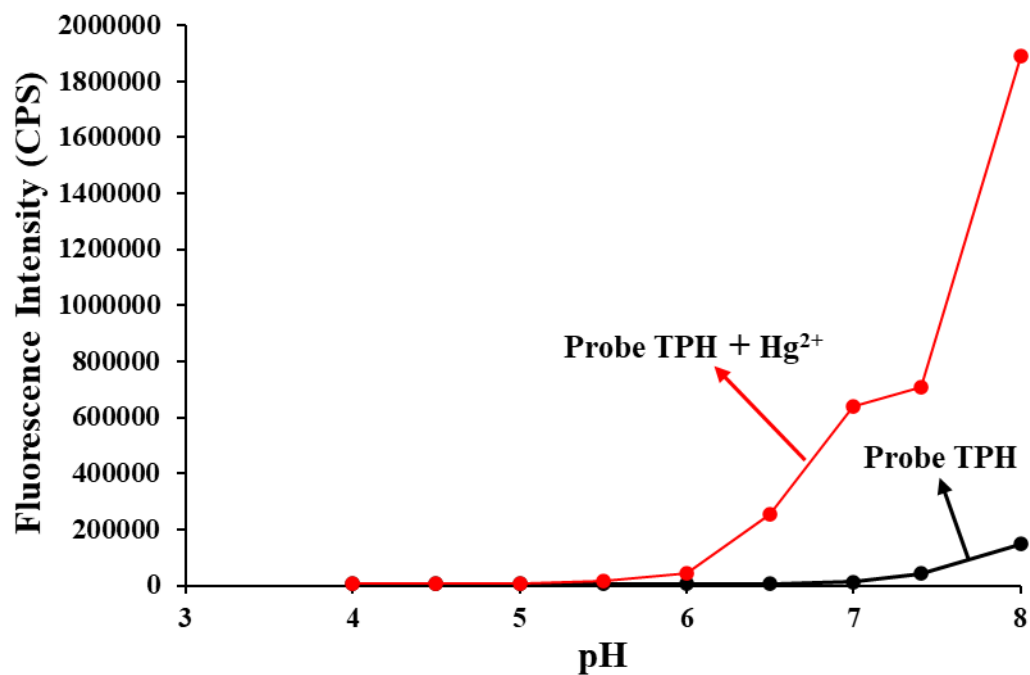

Figure S5. The effects of pH on probe TPH (5  $\mu\text{M}$ ) for detecting  $\text{Hg}^{2+}$  (20  $\mu\text{M}$ ).

### 4. The emission of the probe TPH at different excitation wavelengths

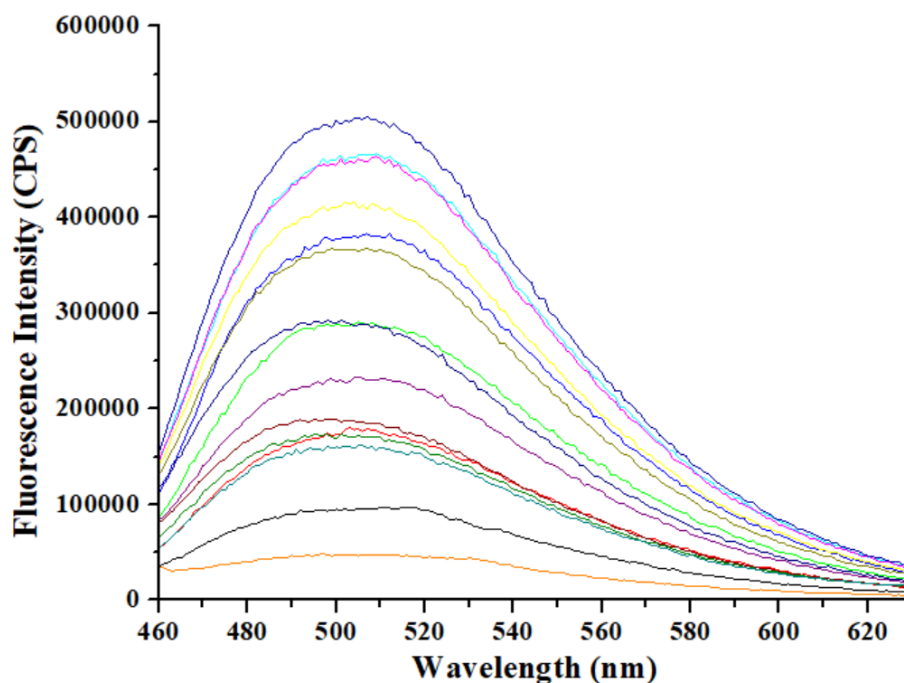

Figure S6. The emission of the probe TPH at different excitation wavelengths (320-450 nm)

## 5. The stability of the probe TPH in water

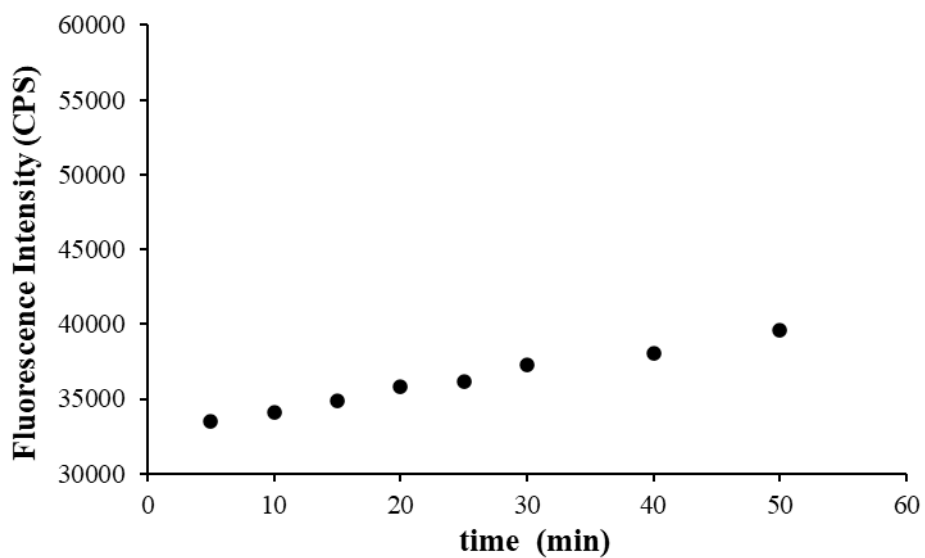

**Figure S7.** The stability of the probe TPH in water

## 6. The forms of salts were used of the metal ions.

The forms of salts were used in this paper:  $\text{MgSO}_4$ ,  $\text{CoSO}_4$ ,  $\text{NiSO}_4$ ,  $\text{MnSO}_4$ ,  $\text{ZnCl}_2$ ,  $\text{CuSO}_4$ ,  $\text{NaCl}$ ,  $\text{AgNO}_3$ ,  $\text{CaCl}_2$ ,  $\text{Pb}(\text{NO}_3)_2$ ,  $\text{CdSO}_4$ ,  $\text{AlCl}_3$ ,  $\text{FeSO}_4$ ,  $\text{Fe}_2(\text{SO}_4)_3$ ,  $\text{KCl}$ ,  $\text{SnCl}_2$ ,  $\text{CrSO}_4$ .
